# Supplementary material
Source: PubMed Central journal article supplement (PMC2755253)
Supplement: NIHMS125786-supplement-Supplementary_Data.pdf [file NIHMS125786-supplement-Supplementary_Data.pdf]

## SUPPLEMENTARY INFORMATION

### SUPPLEMENTARY METHODS

#### Sample Selection

For genome-wide genotyping, cases were defined as a child diagnosed with neuroblastoma or ganglioneuroblastoma and registered through the Children's Oncology Group (COG). The blood samples from the neuroblastoma cases were identified through the COG Neuroblastoma bio-repository for specimen collection at the time of diagnosis. The majority of specimens were annotated with clinical and genomic information that included: age at diagnosis, site of origin, disease stage by the International Neuroblastoma Staging System<sup>26</sup>, INPC International Neuroblastoma Pathology Classification<sup>27</sup>, *MYCN* oncogene copy number<sup>28</sup>, DNA index (ploidy)<sup>29</sup>, registration on clinical trial(s), event-free and overall survival, second malignancies, and any associated conditions (e.g. congenital abnormalities).

Eligibility criterion for genotyping was availability of 1.5 µg of high quality DNA from a tumor-free source such as peripheral blood or uninvolved (with tumor) bone marrow mononuclear cells. Because neuroblastoma in the United States is demographically a disease of Caucasians of European descent<sup>32</sup>, we limited our initial analyses to this racial group to minimize phenotypic variability.

Additional criteria for incorporation into CNV analysis included standard deviation of Log-R-Ratio  $\leq 0.35$  and the ability to use a common reference set for copy number estimation. Given that neuroblastoma patients may have circulating tumor DNA/cells, we also carefully excluded any case in the discovery set with evidence in the blood/bone marrow of *MYCN* amplification and/or large-scale genomic alterations commonly detected in neuroblastoma primary tumors<sup>5</sup>; this assessment was based on DNA copy number generated from the SNP

data. The exclusion criteria used in the replication sets was slightly different. Here, we excluded any case with evidence for large scale genomic alterations, but did not exclude a case if the only detectable tumor-like genomic alteration was amplification or low-level gain of *MYCN*.

Our starting point for the discovery case series and first replication case series were the exact discovery and replication set reported by Maris and colleagues<sup>1</sup>. These were all self-described Caucasian individuals, confirmed by SNP analysis of AIMs markers. After quality filtering described above, 846 (out of 1032) cases remained in the discovery case series, and 363 (out of 401) remained in the first replication case series. **Supplementary Table 1** details how we arrived at these numbers. To further address the possibility of population substructure captured by SNPs not in linkage disequilibrium (LD), we performed a multi-dimensional scaling (MDS) analysis of the discovery cases and controls along with a well-characterized set of Caucasian, African American, and Asian samples. **Supplementary Figure 1** plots the first two scaling dimensions and indicates that population substructure is not likely to have a significant impact on the findings of this CNV-based study.

For the second replication set used in this study, a starting set of 285 independent Caucasian cases were identified by assessing the first two components of an MDS analysis of all SNPs using ~20,000 individuals of multiple ethnicities that were accrued and genotyped at the Children's Hospital of Philadelphia (CHOP). Of these, 232 passed our quality control criteria and were utilized in the second replication set (**Supplementary Table 1**). **Supplementary Table 2** summarizes the clinical and biological co-variate data for each case series.

Control subjects were recruited from the Philadelphia region through the CHOP Health Care Network, including four primary care clinics and several group practices and outpatient

practices that included well child visits. Eligibility criteria for control subjects were: 1) self-reported as Caucasian; 2) availability of 1.5 µg of high quality DNA from peripheral blood mononuclear cells; and 3) no serious underlying medical disorder, including cancer.

The controls in the discovery and first replication set used in this study represent a subset of those reported by Maris and colleagues<sup>1</sup>. Additional criteria for incorporation into CNV analysis included standard deviation of Log-R-Ratio  $\leq 0.35$  and the ability to use a common reference set for copy number estimation. **Supplemental Table 1** details how we arrived at our final discovery control set of 803 and initial replication set of 1139.

For the second replication set used in this study, a starting set of 2,267 independent Caucasian controls were identified by assessing the first two components of an MDS analysis of all SNPs using ~20,000 individuals of multiple ethnicities that were accrued and genotyped at CHOP. A total of 2,218 of these controls passed quality control and were used in this study (**Supplemental Table 1**). The median age of the control cohort at the time of sample collection was 10.0 years.

### **Genome-wide SNP Genotyping**

Genotyping for both the discovery and replication phase was performed using the Illumina Infinium™ II HumanHap550 BeadChip according to methods detailed elsewhere<sup>15,30</sup>, and summarized here. DNA samples were surveyed for quality both by optical density spectrophotometry and the pico-green assay. Samples judged to be of sufficient quality for genotyping were assayed on the Illumina Infinium™ II HumanHap550 BeadChip technology<sup>15,30</sup>, (Illumina, San Diego) at the Center for Applied Genomics at the Children's Hospital of

Philadelphia. A total of 750 nanograms of germline genomic DNA was used to genotype each sample, according to the manufacturer's guidelines. On day one, genomic DNA was amplified 1000-1500-fold; and on day two, the amplified DNA was fragmented to ~300-600 basepairs (bp), precipitated and resuspended followed by hybridization onto a BeadChip. Single base extension (SBE) utilized a single probe sequence of approximately 50 bp long designed to hybridize immediately adjacent to the single nucleotide polymorphism (SNP) query site. Following targeted hybridization to the bead array, the arrayed SNP locus-specific primers (attached to beads) were extended with a single hapten-labeled dideoxynucleotide in the single base extension reaction. The haptens were subsequently detected by a multi-layer immunohistochemical sandwich assay. The Illumina BeadArray Reader scanned each BeadChip at two wavelengths and created an image file. As BeadChip images were collected, intensity values were determined for all instances of each bead type, and data files were created that summarized intensity values for each bead type. These files consisted of intensity data that was loaded directly into Illumina's genotype analysis software, BeadStudio. A bead pool manifest created from the Laboratory Information Management System (LIMS) database containing all the BeadChip data was loaded into BeadStudio along with the intensity data for the samples. Data was normalized within BeadStudio to minimize BeadChip to BeadChip variability. Once the normalization was complete, the clustering algorithm was run to evaluate cluster positions for each locus, assign individual genotypes, a B-Allele Frequency (BAF), and the Log-R-Ratio (LRR).

## SUPPLEMENTARY TABLES

|                         | Discovery Cases | Discovery Controls | Replication Set 1 Cases | Replication Set 1 Controls | Replication Set 2 Cases | Replication Set 2 Controls |
|-------------------------|-----------------|--------------------|-------------------------|----------------------------|-------------------------|----------------------------|
| <b>Total considered</b> | 1,032           | 2,043              | 401                     | 1,178                      | 285                     | 2,267                      |
| tumor DNA               | 112             | 0                  | 12                      | 0                          | 10                      | 0                          |
| common reference        | 0               | 1,130              | 0                       | 0                          | 0                       | 0                          |
| SD LRR < 0.35           | 74              | 110                | 26                      | 39                         | 43                      | 49                         |
| <b>Total final set</b>  | <b>846</b>      | <b>803</b>         | <b>363</b>              | <b>1,139</b>               | <b>232</b>              | <b>2,218</b>               |

**Supplementary Table 1. Quality control of discovery and replication sets.** List of total number of samples considered, total number excluded at each (successive) QC step, and the final number used in each phase of the GWAS. The starting point for the discovery and first replication set were the exact sample sets utilized by Maris and colleagues<sup>7</sup>. The starting point for the second replication set was an independent set of 285 Caucasian cases and 2,267 Caucasian controls as described in Detailed Methods.

| Characteristic    | Discovery Set<br>N=846 | Replication Set 1<br>N=363 | Replication Set 2<br>N=232 | Primary Tumor Set<br>N=488 |
|-------------------|------------------------|----------------------------|----------------------------|----------------------------|
| <b>Sex</b>        |                        |                            |                            |                            |
| Female            | 409 (49)               | 178 (49)                   | 77 (45)                    | 223 (46)                   |
| Male              | 432 (51)               | 185 (51)                   | 95 (55)                    | 265 (54)                   |
| Not Available     | 5                      | 0                          | 60                         | 0                          |
| <b>Age</b>        |                        |                            |                            |                            |
| < 1 yr            | 325 (39)               | 128 (35)                   | 68 (33)                    | 153 (31)                   |
| ≥ 1 yr            | 515 (61)               | 235 (65)                   | 137 (67)                   | 335 (69)                   |
| Not Available     | 6                      | 0                          | 27                         | 0                          |
| <b>INSS Stage</b> |                        |                            |                            |                            |
| Stage 1           | 192 (24)               | 58 (17)                    | 29 (15)                    | 54 (11)                    |
| Stage 2           | 124 (15)               | 43 (12)                    | 22 (10)                    | 46 (9)                     |
| Stage 3           | 140 (17)               | 59 (17)                    | 33 (17)                    | 86 (18)                    |
| Stage 4           | 304 (37)               | 165 (47)                   | 98 (50)                    | 259 (53)                   |
| Stage 4S          | 47 (6)                 | 25 (7)                     | 16 (8)                     | 43 (9)                     |
| Not Available     | 39                     | 13                         | 35                         | 0                          |
| <b>MYCN</b>       |                        |                            |                            |                            |
| Not Amplified     | 693 (86)               | 246 (79)                   | 145 (79)                   | 376 (77)                   |
| Amplified         | 112 (14)               | 63 (21)                    | 38 (21)                    | 109 (22)                   |
| Not available     | 41                     | 54                         | 49                         | 0                          |
| <b>Histology</b>  |                        |                            |                            |                            |
| Favorable         | 392 (58)               | 151 (55)                   | 91 (56)                    | 196 (42)                   |
| Unfavorable       | 280 (42)               | 126 (45)                   | 71                         | 268 (58)                   |
| Not available     | 174                    | 86                         | 70                         | 24                         |
| <b>DNA index</b>  |                        |                            |                            |                            |
| Hyperdiploid      | 539 (67)               | 190 (63)                   | 92 (56)                    | 305 (63)                   |
| Diploid           | 262 (33)               | 114 (37)                   | 73 (44)                    | 179 (37)                   |
| Not available     | 45                     | 59                         | 67                         | 4                          |
| <b>Risk</b>       |                        |                            |                            |                            |
| Low               | 352 (44)               | 108 (32)                   | 58 (30)                    | 128 (26)                   |
| Intermediate      | 145 (18)               | 66 (20)                    | 36 (19)                    | 75 (15)                    |
| High              | 297 (37)               | 162 (48)                   | 99 (51)                    | 285 (58)                   |
| Not available     | 52                     | 27                         | 39                         | 0                          |

**Supplementary Table 2. Neuroblastoma sample characteristics.** Neuroblastoma patient and tumor characteristics for 846 cases used in the discovery set, 363 cases used in the replication set-1, 232 cases used in replication set-2, and 488 primary tumors after data quality control filtration and exclusion of outliers. 226 of the 488 tumors analyzed were matched to blood DNA from individuals in the CNV-based GWAS. Frequency within each clinical/biological subset is listed in parentheses.

| SNP        | Chr | Position  | Gene(s)       | Cases Loss | Cases No Loss | Ctrls Loss | Ctrls No Loss | Cases Loss % | Ctrls Loss % | P-value  |
|------------|-----|-----------|---------------|------------|---------------|------------|---------------|--------------|--------------|----------|
| rs11579261 | 1   | 147305744 | Putative NBPF | 128        | 718           | 42         | 761           | 15.1         | 5.2          | 2.38E-11 |
| rs17162082 | 1   | 147306690 | Putative NBPF | 128        | 718           | 42         | 761           | 15.1         | 5.2          | 2.38E-11 |
| rs17161949 | 1   | 147311729 | Putative NBPF | 128        | 718           | 42         | 761           | 15.1         | 5.2          | 2.38E-11 |
| rs6673776  | 1   | 147327306 | Putative NBPF | 128        | 718           | 42         | 761           | 15.1         | 5.2          | 2.38E-11 |
| rs17162074 | 1   | 147331145 | Putative NBPF | 128        | 718           | 42         | 761           | 15.1         | 5.2          | 2.38E-11 |
| rs11587304 | 1   | 147414362 | Putative NBPF | 108        | 738           | 31         | 772           | 12.8         | 3.9          | 3.62E-11 |
| rs3853524  | 1   | 147427061 | Putative NBPF | 103        | 743           | 29         | 774           | 12.2         | 3.6          | 7.83E-11 |
| rs7782269  | 7   | 38285115  | TCRG          | 267        | 579           | 123        | 680           | 31.6         | 15.3         | 5.31E-15 |
| rs2240826  | 7   | 38285864  | TCRG          | 268        | 578           | 123        | 680           | 31.7         | 15.3         | 3.52E-15 |
| rs2240827  | 7   | 38285961  | TCRG          | 268        | 578           | 123        | 680           | 31.7         | 15.3         | 3.52E-15 |
| rs1546833  | 7   | 38290215  | TCRG          | 269        | 577           | 123        | 680           | 31.8         | 15.3         | 2.33E-15 |
| rs10155916 | 7   | 38292303  | TCRG          | 271        | 575           | 123        | 680           | 32.0         | 15.3         | 1.02E-15 |
| rs1860516  | 7   | 38292502  | TCRG          | 271        | 575           | 123        | 680           | 32.0         | 15.3         | 1.02E-15 |
| rs2240832  | 7   | 38295538  | TCRG          | 292        | 554           | 127        | 676           | 34.5         | 15.8         | 1.52E-18 |
| rs12154478 | 7   | 38296343  | TCRG          | 301        | 545           | 128        | 675           | 35.6         | 15.9         | 4.60E-20 |
| rs1860517  | 7   | 38297335  | TCRG          | 301        | 545           | 126        | 677           | 35.6         | 15.7         | 1.34E-20 |
| rs1860520  | 7   | 38297796  | TCRG          | 301        | 545           | 126        | 677           | 35.6         | 15.7         | 1.34E-20 |
| rs1860521  | 7   | 38298029  | TCRG          | 302        | 544           | 126        | 677           | 35.7         | 15.7         | 8.35E-21 |
| rs6462829  | 7   | 38298742  | TCRG          | 308        | 538           | 128        | 675           | 36.4         | 15.9         | 1.72E-21 |
| rs10441090 | 7   | 38301343  | TCRG          | 303        | 543           | 130        | 673           | 35.8         | 16.2         | 6.18E-20 |
| rs2191311  | 7   | 38302045  | TCRG          | 302        | 544           | 130        | 673           | 35.7         | 16.2         | 9.78E-20 |
| rs2248839  | 7   | 38307751  | TCRG          | 284        | 562           | 115        | 688           | 33.6         | 14.3         | 4.09E-20 |
| rs2736973  | 7   | 38308140  | TCRG          | 281        | 565           | 114        | 689           | 33.2         | 14.2         | 5.86E-20 |
| rs2240839  | 7   | 38308450  | TCRG          | 260        | 586           | 107        | 696           | 30.7         | 13.3         | 1.16E-17 |
| rs2392545  | 7   | 38309522  | TCRG          | 249        | 597           | 106        | 697           | 29.4         | 13.2         | 5.60E-16 |
| rs2392546  | 7   | 38309610  | TCRG          | 246        | 600           | 105        | 698           | 29.1         | 13.1         | 1.13E-15 |
| rs2736969  | 7   | 38310481  | TCRG          | 228        | 618           | 74         | 729           | 27.0         | 9.2          | 3.13E-21 |
| rs2736964  | 7   | 38311294  | TCRG          | 221        | 625           | 69         | 734           | 26.1         | 8.6          | 2.27E-21 |
| rs6953248  | 7   | 38322940  | TCRG          | 214        | 632           | 61         | 742           | 25.3         | 7.6          | 6.76E-23 |
| rs17171329 | 7   | 38323070  | TCRG          | 215        | 631           | 61         | 742           | 25.4         | 7.6          | 3.95E-23 |
| rs11769443 | 7   | 38323600  | TCRG          | 208        | 638           | 59         | 744           | 24.6         | 7.3          | 2.96E-22 |
| rs11980080 | 7   | 38323719  | TCRG          | 208        | 638           | 59         | 744           | 24.6         | 7.3          | 2.96E-22 |
| rs11765884 | 7   | 38323848  | TCRG          | 204        | 642           | 55         | 748           | 24.1         | 6.8          | 7.43E-23 |
| rs2534565  | 7   | 38324752  | TCRG          | 187        | 659           | 22         | 781           | 22.1         | 2.7          | 6.84E-36 |
| rs2240845  | 7   | 38324937  | TCRG          | 188        | 658           | 22         | 781           | 22.2         | 2.7          | 3.45E-36 |
| rs2534567  | 7   | 38325481  | TCRG          | 184        | 662           | 22         | 781           | 21.7         | 2.7          | 5.31E-35 |
| rs2534568  | 7   | 38326165  | TCRG          | 183        | 663           | 22         | 781           | 21.6         | 2.7          | 1.05E-34 |
| rs2240848  | 7   | 38327992  | TCRG          | 185        | 661           | 23         | 780           | 21.9         | 2.9          | 1.27E-34 |
| rs11975431 | 7   | 38328150  | TCRG          | 189        | 657           | 23         | 780           | 22.3         | 2.9          | 8.43E-36 |
| rs718880   | 7   | 38328524  | TCRG          | 192        | 654           | 22         | 781           | 22.7         | 2.7          | 2.20E-37 |
| rs2240849  | 7   | 38328597  | TCRG          | 192        | 654           | 23         | 780           | 22.7         | 2.9          | 1.09E-36 |
| rs17171331 | 7   | 38329482  | TCRG          | 194        | 652           | 27         | 776           | 22.9         | 3.4          | 1.25E-34 |

|            |    |           |               |     |     |    |     |      |      |          |
|------------|----|-----------|---------------|-----|-----|----|-----|------|------|----------|
| rs11984094 | 7  | 38330091  | TCRG          | 189 | 657 | 29 | 774 | 22.3 | 3.6  | 5.62E-32 |
| rs2240850  | 7  | 38330273  | TCRG          | 191 | 655 | 35 | 768 | 22.6 | 4.4  | 6.73E-29 |
| rs2240851  | 7  | 38330454  | TCRG          | 188 | 658 | 35 | 768 | 22.2 | 4.4  | 2.50E-28 |
| rs17496969 | 7  | 38330814  | TCRG          | 189 | 657 | 35 | 768 | 22.3 | 4.4  | 2.34E-28 |
| rs2735179  | 7  | 38331130  | TCRG          | 190 | 656 | 33 | 770 | 22.5 | 4.1  | 6.01E-30 |
| rs10487742 | 7  | 38333037  | TCRG          | 180 | 666 | 25 | 778 | 21.3 | 3.1  | 7.01E-32 |
| rs2191312  | 7  | 38333784  | TCRG          | 172 | 674 | 25 | 778 | 20.3 | 3.1  | 1.30E-29 |
| rs6966279  | 7  | 38336073  | TCRG          | 171 | 675 | 24 | 779 | 20.2 | 3.0  | 6.11E-30 |
| rs2534575  | 7  | 38337999  | TCRG          | 158 | 688 | 23 | 780 | 18.7 | 2.9  | 3.49E-27 |
| rs2534578  | 7  | 38340056  | TCRG          | 126 | 720 | 17 | 786 | 14.9 | 2.1  | 2.28E-22 |
| rs2240853  | 7  | 38341222  | TCRG          | 99  | 747 | 9  | 794 | 11.7 | 1.1  | 2.12E-20 |
| rs733905   | 7  | 38346971  | TCRG          | 73  | 773 | 4  | 799 | 8.6  | 0.5  | 1.90E-17 |
| rs2213212  | 7  | 142086318 | TCRVB         | 33  | 813 | 1  | 802 | 3.9  | 0.1  | 4.10E-09 |
| rs2027801  | 7  | 142100266 | TCRVB         | 38  | 808 | 1  | 802 | 4.5  | 0.1  | 1.45E-10 |
| rs17251    | 7  | 142102868 | TCRVB         | 39  | 807 | 1  | 802 | 4.6  | 0.1  | 7.42E-11 |
| rs4726572  | 7  | 142104421 | TCRVB         | 39  | 807 | 1  | 802 | 4.6  | 0.1  | 7.42E-11 |
| rs6464528  | 7  | 142104463 | TCRVB         | 39  | 807 | 1  | 802 | 4.6  | 0.1  | 7.42E-11 |
| rs6959895  | 7  | 142114524 | TCRVB         | 44  | 802 | 2  | 801 | 5.2  | 0.2  | 3.02E-11 |
| rs1964986  | 7  | 142127214 | TCRVB         | 40  | 806 | 2  | 801 | 4.7  | 0.2  | 4.09E-10 |
| rs2855983  | 7  | 142178383 | TCRVB         | 43  | 803 | 2  | 801 | 5.1  | 0.2  | 5.80E-11 |
| rs2734222  | 7  | 142187838 | TCRVB         | 41  | 805 | 2  | 801 | 4.8  | 0.2  | 2.14E-10 |
| rs2734224  | 7  | 142188690 | TCRVB         | 38  | 808 | 2  | 801 | 4.5  | 0.2  | 1.49E-09 |
| rs2367486  | 7  | 142192134 | TCRVB         | 35  | 811 | 2  | 801 | 4.1  | 0.2  | 1.03E-08 |
| rs979027   | 14 | 21558349  | TCRA,<br>TCRD | 44  | 802 | 5  | 798 | 5.2  | 0.6  | 1.35E-08 |
| rs17113407 | 14 | 21558421  | TCRA,<br>TCRD | 44  | 802 | 5  | 798 | 5.2  | 0.6  | 1.35E-08 |
| rs7147975  | 14 | 21560562  | TCRA,<br>TCRD | 44  | 802 | 5  | 798 | 5.2  | 0.6  | 1.35E-08 |
| rs12888049 | 14 | 21564578  | TCRA,<br>TCRD | 47  | 799 | 7  | 796 | 5.6  | 0.9  | 3.58E-08 |
| rs8022710  | 14 | 21565869  | TCRA,<br>TCRD | 52  | 794 | 10 | 793 | 6.1  | 1.2  | 7.86E-08 |
| rs990962   | 14 | 21637401  | TCRA,<br>TCRD | 103 | 743 | 38 | 765 | 12.2 | 4.7  | 5.09E-08 |
| rs8022578  | 14 | 21640025  | TCRA,<br>TCRD | 107 | 739 | 40 | 763 | 12.6 | 5.0  | 3.46E-08 |
| rs6572261  | 14 | 21641738  | TCRA,<br>TCRD | 108 | 738 | 40 | 763 | 12.8 | 5.0  | 2.30E-08 |
| rs6572331  | 14 | 21784682  | TCRA,<br>TCRD | 174 | 672 | 80 | 723 | 20.6 | 10.0 | 2.17E-09 |
| rs4982590  | 14 | 21788239  | TCRA,<br>TCRD | 174 | 672 | 79 | 724 | 20.6 | 9.8  | 1.32E-09 |
| rs10148895 | 14 | 21792564  | TCRA,<br>TCRD | 184 | 662 | 80 | 723 | 21.7 | 10.0 | 4.90E-11 |
| rs7155927  | 14 | 21800821  | TCRA,<br>TCRD | 196 | 650 | 80 | 723 | 23.2 | 10.0 | 3.83E-13 |
| rs7141113  | 14 | 21805737  | TCRA,<br>TCRD | 196 | 650 | 79 | 724 | 23.2 | 9.8  | 2.11E-13 |
| rs6572349  | 14 | 21806088  | TCRA,<br>TCRD | 196 | 650 | 79 | 724 | 23.2 | 9.8  | 2.11E-13 |
| rs6572351  | 14 | 21806138  | TCRA,<br>TCRD | 196 | 650 | 79 | 724 | 23.2 | 9.8  | 2.11E-13 |
| rs12881142 | 14 | 21806360  | TCRA,<br>TCRD | 196 | 650 | 79 | 724 | 23.2 | 9.8  | 2.11E-13 |
| rs2331599  | 14 | 21806501  | TCRA,<br>TCRD | 200 | 646 | 78 | 725 | 23.6 | 9.7  | 2.05E-14 |
| rs9972232  | 14 | 21807431  | TCRA,<br>TCRD | 210 | 636 | 84 | 719 | 24.8 | 10.5 | 1.58E-14 |



|            |    |          |               |     |     |     |     |      |      |          |
|------------|----|----------|---------------|-----|-----|-----|-----|------|------|----------|
| rs3811272  | 14 | 21811574 | TCRA,<br>TCRD | 215 | 631 | 86  | 717 | 25.4 | 10.7 | 6.10E-15 |
| rs741711   | 14 | 21923525 | TCRA,<br>TCRD | 262 | 584 | 114 | 689 | 31.0 | 14.2 | 2.99E-16 |
| rs3811250  | 14 | 21925810 | TCRA,<br>TCRD | 259 | 587 | 113 | 690 | 30.6 | 14.1 | 6.13E-16 |
| rs3811247  | 14 | 21928200 | TCRA,<br>TCRD | 255 | 591 | 114 | 689 | 30.1 | 14.2 | 5.80E-15 |
| rs3811244  | 14 | 21929322 | TCRA,<br>TCRD | 255 | 591 | 115 | 688 | 30.1 | 14.3 | 9.99E-15 |
| rs12891257 | 14 | 21931475 | TCRA,<br>TCRD | 257 | 589 | 114 | 689 | 30.4 | 14.2 | 2.51E-15 |
| rs10142552 | 14 | 21933475 | TCRA,<br>TCRD | 256 | 590 | 114 | 689 | 30.3 | 14.2 | 3.82E-15 |
| rs3811240  | 14 | 21937715 | TCRA,<br>TCRD | 259 | 587 | 115 | 688 | 30.6 | 14.3 | 1.88E-15 |
| rs1040303  | 14 | 21941618 | TCRA,<br>TCRD | 265 | 581 | 119 | 684 | 31.3 | 14.8 | 1.38E-15 |
| rs7150307  | 14 | 21943295 | TCRA,<br>TCRD | 267 | 579 | 119 | 684 | 31.6 | 14.8 | 5.96E-16 |
| rs11624054 | 14 | 21944336 | TCRA,<br>TCRD | 268 | 578 | 119 | 684 | 31.7 | 14.8 | 3.90E-16 |
| rs714795   | 14 | 21946458 | TCRA,<br>TCRD | 263 | 583 | 117 | 686 | 31.1 | 14.6 | 1.06E-15 |
| rs4982635  | 14 | 21949578 | TCRA,<br>TCRD | 265 | 581 | 123 | 680 | 31.3 | 15.3 | 1.20E-14 |
| rs760019   | 14 | 21953018 | TCRA,<br>TCRD | 269 | 577 | 131 | 672 | 31.8 | 16.3 | 2.02E-13 |
| rs3811236  | 14 | 21956159 | TCRA,<br>TCRD | 298 | 548 | 161 | 642 | 35.2 | 20.0 | 5.33E-12 |
| rs2301201  | 14 | 21957570 | TCRA,<br>TCRD | 301 | 545 | 159 | 644 | 35.6 | 19.8 | 7.49E-13 |
| rs6572449  | 14 | 21970760 | TCRA,<br>TCRD | 330 | 516 | 192 | 611 | 39.0 | 23.9 | 4.45E-11 |
| rs7142158  | 14 | 21972830 | TCRA,<br>TCRD | 330 | 516 | 192 | 611 | 39.0 | 23.9 | 4.45E-11 |
| rs2141988  | 14 | 21973302 | TCRA,<br>TCRD | 330 | 516 | 192 | 611 | 39.0 | 23.9 | 4.45E-11 |
| rs3811232  | 14 | 21973771 | TCRA,<br>TCRD | 330 | 516 | 192 | 611 | 39.0 | 23.9 | 4.45E-11 |
| rs8021297  | 14 | 21974905 | TCRA,<br>TCRD | 330 | 516 | 192 | 611 | 39.0 | 23.9 | 4.45E-11 |
| rs11623995 | 14 | 21975565 | TCRA,<br>TCRD | 335 | 511 | 201 | 602 | 39.6 | 25.0 | 2.54E-10 |
| rs11157596 | 14 | 21976908 | TCRA,<br>TCRD | 334 | 512 | 204 | 599 | 39.5 | 25.4 | 1.03E-09 |
| rs12147516 | 14 | 21985656 | TCRA,<br>TCRD | 382 | 464 | 243 | 560 | 45.2 | 30.3 | 5.32E-10 |
| rs10483273 | 14 | 21986886 | TCRA,<br>TCRD | 379 | 467 | 238 | 565 | 44.8 | 29.6 | 2.48E-10 |
| rs11848747 | 14 | 21991120 | TCRA,<br>TCRD | 368 | 478 | 216 | 587 | 43.5 | 26.9 | 2.08E-12 |
| rs2242545  | 14 | 21994034 | TCRA,<br>TCRD | 371 | 475 | 226 | 577 | 43.9 | 28.1 | 3.36E-11 |
| rs1882704  | 14 | 21995192 | TCRA,<br>TCRD | 370 | 476 | 229 | 574 | 43.7 | 28.5 | 1.38E-10 |
| rs17794083 | 14 | 21996759 | TCRA,<br>TCRD | 370 | 476 | 227 | 576 | 43.7 | 28.3 | 6.74E-11 |
| rs10162417 | 14 | 21999540 | TCRA,<br>TCRD | 364 | 482 | 241 | 562 | 43.0 | 30.0 | 4.35E-08 |
| rs10131293 | 14 | 21999998 | TCRA,<br>TCRD | 364 | 482 | 239 | 564 | 43.0 | 29.8 | 2.36E-08 |
| rs2733776  | 14 | 22000627 | TCRA,<br>TCRD | 359 | 487 | 233 | 570 | 42.4 | 29.0 | 1.52E-08 |
| rs10483275 | 14 | 22002896 | TCRA,<br>TCRD | 341 | 505 | 215 | 588 | 40.3 | 26.8 | 6.75E-09 |
| rs8020193  | 14 | 22009307 | TCRA,<br>TCRD | 254 | 592 | 119 | 684 | 30.0 | 14.8 | 1.23E-13 |

|            |    |          |               |     |     |     |     |      |      |          |
|------------|----|----------|---------------|-----|-----|-----|-----|------|------|----------|
| rs10483277 | 14 | 22010682 | TCRA,<br>TCRD | 241 | 605 | 114 | 689 | 28.5 | 14.2 | 1.61E-12 |
| rs2293732  | 14 | 22011989 | TCRA,<br>TCRD | 237 | 609 | 113 | 690 | 28.0 | 14.1 | 3.19E-12 |
| rs1076861  | 14 | 22012459 | TCRA,<br>TCRD | 221 | 625 | 102 | 701 | 26.1 | 12.7 | 5.88E-12 |
| rs2254272  | 14 | 22012730 | TCRA,<br>TCRD | 220 | 626 | 98  | 705 | 26.0 | 12.2 | 1.09E-12 |
| rs7161733  | 14 | 22015032 | TCRA,<br>TCRD | 217 | 629 | 92  | 711 | 25.7 | 11.5 | 9.16E-14 |
| rs10132733 | 14 | 22016071 | TCRA,<br>TCRD | 202 | 644 | 85  | 718 | 23.9 | 10.6 | 8.37E-13 |
| rs227859   | 14 | 22018311 | TCRA,<br>TCRD | 162 | 684 | 68  | 735 | 19.1 | 8.5  | 2.69E-10 |
| rs762578   | 14 | 22020088 | TCRA,<br>TCRD | 155 | 691 | 63  | 740 | 18.3 | 7.8  | 2.54E-10 |
| rs3811222  | 14 | 22020854 | TCRA,<br>TCRD | 151 | 695 | 62  | 741 | 17.8 | 7.7  | 7.09E-10 |
| rs3811221  | 14 | 22022792 | TCRA,<br>TCRD | 146 | 700 | 60  | 743 | 17.3 | 7.5  | 1.66E-09 |
| rs227867   | 14 | 22023701 | TCRA,<br>TCRD | 141 | 705 | 57  | 746 | 16.7 | 7.1  | 1.50E-09 |
| rs996165   | 14 | 22024524 | TCRA,<br>TCRD | 134 | 712 | 50  | 753 | 15.8 | 6.2  | 3.77E-10 |
| rs3811215  | 14 | 22024617 | TCRA,<br>TCRD | 127 | 719 | 47  | 756 | 15.0 | 5.9  | 1.07E-09 |
| rs2128997  | 14 | 22030942 | TCRA,<br>TCRD | 87  | 759 | 29  | 774 | 10.3 | 3.6  | 7.57E-08 |
|            |    |          |               |     |     |     |     |      |      |          |

**Supplementary Table 3. Genome-wide significant SNPs with copy number changes from Discovery Phase.** Genomic coordinates based on build 36.1 of human genome. Two-tailed *P*-value based on Fisher's exact test reported. Results based on 846 Caucasian Cases and 803 healthy Caucasian Controls.

| SNP        | Chr | Position  | Genes         | Cases Loss | Cases No Loss | Ctrls Loss | Ctrls No Loss | Cases Loss % | Ctrls Loss % | P-value  |
|------------|-----|-----------|---------------|------------|---------------|------------|---------------|--------------|--------------|----------|
| rs11579261 | 1   | 147305744 | Putative NBPF | 52         | 311           | 99         | 1040          | 14.3         | 8.7          | 2.58E-03 |
| rs17162082 | 1   | 147306690 | Putative NBPF | 52         | 311           | 99         | 1040          | 14.3         | 8.7          | 2.58E-03 |
| rs17161949 | 1   | 147311729 | Putative NBPF | 52         | 311           | 99         | 1040          | 14.3         | 8.7          | 2.58E-03 |
| rs6673776  | 1   | 147327306 | Putative NBPF | 52         | 311           | 99         | 1040          | 14.3         | 8.7          | 2.58E-03 |
| rs17162074 | 1   | 147331145 | Putative NBPF | 52         | 311           | 99         | 1040          | 14.3         | 8.7          | 2.58E-03 |
| rs11587304 | 1   | 147414362 | Putative NBPF | 39         | 324           | 73         | 1066          | 10.7         | 6.4          | 8.15E-03 |
| rs3853524  | 1   | 147427061 | Putative NBPF | 39         | 324           | 73         | 1066          | 10.7         | 6.4          | 8.15E-03 |
| rs7782269  | 7   | 38285115  | TCRG          | 103        | 260           | 91         | 1048          | 28.4         | 8.0          | 9.41E-21 |
| rs2240826  | 7   | 38285864  | TCRG          | 104        | 259           | 91         | 1048          | 28.7         | 8.0          | 2.08E-21 |
| rs2240827  | 7   | 38285961  | TCRG          | 104        | 259           | 91         | 1048          | 28.7         | 8.0          | 2.08E-21 |
| rs1546833  | 7   | 38290215  | TCRG          | 104        | 259           | 90         | 1049          | 28.7         | 7.9          | 1.30E-21 |
| rs10155916 | 7   | 38292303  | TCRG          | 108        | 255           | 92         | 1047          | 29.8         | 8.1          | 8.61E-23 |
| rs1860516  | 7   | 38292502  | TCRG          | 108        | 255           | 92         | 1047          | 29.8         | 8.1          | 8.61E-23 |
| rs2240832  | 7   | 38295538  | TCRG          | 109        | 254           | 99         | 1040          | 30.0         | 8.7          | 1.04E-21 |
| rs12154478 | 7   | 38296343  | TCRG          | 110        | 253           | 99         | 1040          | 30.3         | 8.7          | 4.06E-22 |
| rs1860517  | 7   | 38297335  | TCRG          | 110        | 253           | 102        | 1037          | 30.3         | 9.0          | 2.07E-21 |
| rs1860520  | 7   | 38297796  | TCRG          | 110        | 253           | 105        | 1034          | 30.3         | 9.2          | 1.01E-20 |
| rs1860521  | 7   | 38298029  | TCRG          | 110        | 253           | 106        | 1033          | 30.3         | 9.3          | 1.47E-20 |
| rs6462829  | 7   | 38298742  | TCRG          | 110        | 253           | 105        | 1034          | 30.3         | 9.2          | 1.01E-20 |
| rs10441090 | 7   | 38301343  | TCRG          | 107        | 256           | 105        | 1034          | 29.5         | 9.2          | 2.08E-19 |
| rs2191311  | 7   | 38302045  | TCRG          | 107        | 256           | 104        | 1035          | 29.5         | 9.1          | 9.21E-20 |
| rs2248839  | 7   | 38307751  | TCRG          | 95         | 268           | 100        | 1039          | 26.2         | 8.8          | 8.21E-16 |
| rs2736973  | 7   | 38308140  | TCRG          | 86         | 277           | 91         | 1048          | 23.7         | 8.0          | 4.81E-14 |
| rs2240839  | 7   | 38308450  | TCRG          | 86         | 277           | 88         | 1051          | 23.7         | 7.7          | 1.26E-14 |
| rs2392545  | 7   | 38309522  | TCRG          | 81         | 282           | 86         | 1053          | 22.3         | 7.6          | 2.87E-13 |
| rs2392546  | 7   | 38309610  | TCRG          | 81         | 282           | 86         | 1053          | 22.3         | 7.6          | 2.87E-13 |
| rs2736969  | 7   | 38310481  | TCRG          | 79         | 284           | 63         | 1076          | 21.8         | 5.5          | 1.81E-17 |
| rs2736964  | 7   | 38311294  | TCRG          | 73         | 290           | 60         | 1079          | 20.1         | 5.3          | 1.76E-15 |
| rs6953248  | 7   | 38322940  | TCRG          | 63         | 300           | 58         | 1081          | 17.4         | 5.1          | 4.27E-12 |
| rs17171329 | 7   | 38323070  | TCRG          | 63         | 300           | 58         | 1081          | 17.4         | 5.1          | 4.27E-12 |
| rs11769443 | 7   | 38323600  | TCRG          | 54         | 309           | 43         | 1096          | 14.9         | 3.8          | 5.77E-12 |
| rs11980080 | 7   | 38323719  | TCRG          | 54         | 309           | 43         | 1096          | 14.9         | 3.8          | 5.77E-12 |
| rs11765884 | 7   | 38323848  | TCRG          | 54         | 309           | 38         | 1101          | 14.9         | 3.3          | 2.49E-13 |
| rs2534565  | 7   | 38324752  | TCRG          | 54         | 309           | 29         | 1110          | 14.9         | 2.5          | 4.06E-16 |
| rs2240845  | 7   | 38324937  | TCRG          | 54         | 309           | 29         | 1110          | 14.9         | 2.5          | 4.06E-16 |
| rs2534567  | 7   | 38325481  | TCRG          | 54         | 309           | 28         | 1111          | 14.9         | 2.5          | 1.80E-16 |
| rs2534568  | 7   | 38326165  | TCRG          | 54         | 309           | 28         | 1111          | 14.9         | 2.5          | 1.80E-16 |
| rs2240848  | 7   | 38327992  | TCRG          | 54         | 309           | 29         | 1110          | 14.9         | 2.5          | 4.06E-16 |
| rs11975431 | 7   | 38328150  | TCRG          | 54         | 309           | 28         | 1111          | 14.9         | 2.5          | 1.80E-16 |
| rs718880   | 7   | 38328524  | TCRG          | 49         | 314           | 22         | 1117          | 13.5         | 1.9          | 2.85E-16 |
| rs2240849  | 7   | 38328597  | TCRG          | 49         | 314           | 22         | 1117          | 13.5         | 1.9          | 2.85E-16 |
| rs17171331 | 7   | 38329482  | TCRG          | 51         | 312           | 20         | 1119          | 14.0         | 1.8          | 3.98E-18 |
| rs11984094 | 7   | 38330091  | TCRG          | 47         | 316           | 19         | 1120          | 12.9         | 1.7          | 1.70E-16 |

|            |    |           |               |    |     |     |      |      |      |          |
|------------|----|-----------|---------------|----|-----|-----|------|------|------|----------|
| rs2240850  | 7  | 38330273  | TCRG          | 47 | 316 | 20  | 1119 | 12.9 | 1.8  | 4.47E-16 |
| rs2240851  | 7  | 38330454  | TCRG          | 47 | 316 | 20  | 1119 | 12.9 | 1.8  | 4.47E-16 |
| rs17496969 | 7  | 38330814  | TCRG          | 47 | 316 | 20  | 1119 | 12.9 | 1.8  | 4.47E-16 |
| rs2735179  | 7  | 38331130  | TCRG          | 47 | 316 | 17  | 1122 | 12.9 | 1.5  | 2.19E-17 |
| rs10487742 | 7  | 38333037  | TCRG          | 46 | 317 | 15  | 1124 | 12.7 | 1.3  | 8.29E-18 |
| rs2191312  | 7  | 38333784  | TCRG          | 43 | 320 | 14  | 1125 | 11.8 | 1.2  | 1.08E-16 |
| rs6966279  | 7  | 38336073  | TCRG          | 39 | 324 | 13  | 1126 | 10.7 | 1.1  | 4.65E-15 |
| rs2534575  | 7  | 38337999  | TCRG          | 31 | 332 | 12  | 1127 | 8.5  | 1.1  | 2.19E-11 |
| rs2534578  | 7  | 38340056  | TCRG          | 31 | 332 | 12  | 1127 | 8.5  | 1.1  | 2.19E-11 |
| rs2240853  | 7  | 38341222  | TCRG          | 31 | 332 | 9   | 1130 | 8.5  | 0.8  | 8.20E-13 |
| rs733905   | 7  | 38346971  | TCRG          | 21 | 342 | 2   | 1137 | 5.8  | 0.2  | 1.10E-11 |
| rs2213212  | 7  | 142086318 | TCRVB         | 16 | 347 | 0   | 1139 | 4.4  | 0.0  | 1.05E-10 |
| rs2027801  | 7  | 142100266 | TCRVB         | 14 | 349 | 0   | 1139 | 3.9  | 0.0  | 1.91E-09 |
| rs17251    | 7  | 142102868 | TCRVB         | 14 | 349 | 0   | 1139 | 3.9  | 0.0  | 1.91E-09 |
| rs4726572  | 7  | 142104421 | TCRVB         | 14 | 349 | 0   | 1139 | 3.9  | 0.0  | 1.91E-09 |
| rs6464528  | 7  | 142104463 | TCRVB         | 14 | 349 | 0   | 1139 | 3.9  | 0.0  | 1.91E-09 |
| rs6959895  | 7  | 142114524 | TCRVB         | 15 | 348 | 0   | 1139 | 4.1  | 0.0  | 4.48E-10 |
| rs1964986  | 7  | 142127214 | TCRVB         | 15 | 348 | 0   | 1139 | 4.1  | 0.0  | 4.48E-10 |
| rs2855983  | 7  | 142178383 | TCRVB         | 9  | 354 | 0   | 1139 | 2.5  | 0.0  | 2.61E-06 |
| rs2734222  | 7  | 142187838 | TCRVB         | 7  | 356 | 0   | 1139 | 1.9  | 0.0  | 4.61E-05 |
| rs2734224  | 7  | 142188690 | TCRVB         | 7  | 356 | 0   | 1139 | 1.9  | 0.0  | 4.61E-05 |
| rs2367486  | 7  | 142192134 | TCRVB         | 7  | 356 | 0   | 1139 | 1.9  | 0.0  | 4.61E-05 |
| rs979027   | 14 | 21558349  | TCRA,<br>TCRD | 8  | 355 | 4   | 1135 | 2.2  | 0.4  | 2.11E-03 |
| rs17113407 | 14 | 21558421  | TCRA,<br>TCRD | 8  | 355 | 4   | 1135 | 2.2  | 0.4  | 2.11E-03 |
| rs7147975  | 14 | 21560562  | TCRA,<br>TCRD | 8  | 355 | 5   | 1134 | 2.2  | 0.4  | 4.35E-03 |
| rs12888049 | 14 | 21564578  | TCRA,<br>TCRD | 10 | 353 | 17  | 1122 | 2.8  | 1.5  | 1.17E-01 |
| rs8022710  | 14 | 21565869  | TCRA,<br>TCRD | 13 | 350 | 22  | 1117 | 3.6  | 1.9  | 7.45E-02 |
| rs990962   | 14 | 21637401  | TCRA,<br>TCRD | 49 | 314 | 62  | 1077 | 13.5 | 5.4  | 1.52E-06 |
| rs8022578  | 14 | 21640025  | TCRA,<br>TCRD | 52 | 311 | 67  | 1072 | 14.3 | 5.9  | 1.04E-06 |
| rs6572261  | 14 | 21641738  | TCRA,<br>TCRD | 52 | 311 | 67  | 1072 | 14.3 | 5.9  | 1.04E-06 |
| rs6572331  | 14 | 21784682  | TCRA,<br>TCRD | 63 | 300 | 125 | 1014 | 17.4 | 11.0 | 1.91E-03 |
| rs4982590  | 14 | 21788239  | TCRA,<br>TCRD | 62 | 301 | 121 | 1018 | 17.1 | 10.6 | 1.65E-03 |
| rs10148895 | 14 | 21792564  | TCRA,<br>TCRD | 61 | 302 | 114 | 1025 | 16.8 | 10.0 | 6.87E-04 |
| rs7155927  | 14 | 21800821  | TCRA,<br>TCRD | 60 | 303 | 100 | 1039 | 16.5 | 8.8  | 8.00E-05 |
| rs7141113  | 14 | 21805737  | TCRA,<br>TCRD | 59 | 304 | 93  | 1046 | 16.3 | 8.2  | 2.25E-05 |
| rs6572349  | 14 | 21806088  | TCRA,<br>TCRD | 59 | 304 | 93  | 1046 | 16.3 | 8.2  | 2.25E-05 |
| rs6572351  | 14 | 21806138  | TCRA,<br>TCRD | 59 | 304 | 93  | 1046 | 16.3 | 8.2  | 2.25E-05 |
| rs12881142 | 14 | 21806360  | TCRA,<br>TCRD | 59 | 304 | 93  | 1046 | 16.3 | 8.2  | 2.25E-05 |
| rs2331599  | 14 | 21806501  | TCRA,<br>TCRD | 60 | 303 | 92  | 1047 | 16.5 | 8.1  | 9.10E-06 |
| rs9972232  | 14 | 21807431  | TCRA,<br>TCRD | 66 | 297 | 95  | 1044 | 18.2 | 8.3  | 5.06E-07 |
| rs3811272  | 14 | 21811574  | TCRA,         | 71 | 292 | 101 | 1038 | 19.6 | 8.9  | 1.28E-07 |

|            |    |          |               |     |     |     |      |      |      |          |
|------------|----|----------|---------------|-----|-----|-----|------|------|------|----------|
|            |    |          | TCRD          |     |     |     |      |      |      |          |
| rs741711   | 14 | 21923525 | TCRA,<br>TCRD | 91  | 272 | 134 | 1005 | 25.1 | 11.8 | 3.61E-09 |
| rs3811250  | 14 | 21925810 | TCRA,<br>TCRD | 92  | 271 | 133 | 1006 | 25.3 | 11.7 | 1.30E-09 |
| rs3811247  | 14 | 21928200 | TCRA,<br>TCRD | 93  | 270 | 133 | 1006 | 25.6 | 11.7 | 7.36E-10 |
| rs3811244  | 14 | 21929322 | TCRA,<br>TCRD | 97  | 266 | 135 | 1004 | 26.7 | 11.9 | 1.14E-10 |
| rs12891257 | 14 | 21931475 | TCRA,<br>TCRD | 97  | 266 | 136 | 1003 | 26.7 | 11.9 | 1.27E-10 |
| rs10142552 | 14 | 21933475 | TCRA,<br>TCRD | 97  | 266 | 136 | 1003 | 26.7 | 11.9 | 1.27E-10 |
| rs3811240  | 14 | 21937715 | TCRA,<br>TCRD | 98  | 265 | 135 | 1004 | 27.0 | 11.9 | 4.12E-11 |
| rs1040303  | 14 | 21941618 | TCRA,<br>TCRD | 98  | 265 | 134 | 1005 | 27.0 | 11.8 | 3.54E-11 |
| rs7150307  | 14 | 21943295 | TCRA,<br>TCRD | 97  | 266 | 132 | 1007 | 26.7 | 11.6 | 3.06E-11 |
| rs11624054 | 14 | 21944336 | TCRA,<br>TCRD | 97  | 266 | 130 | 1009 | 26.7 | 11.4 | 2.26E-11 |
| rs714795   | 14 | 21946458 | TCRA,<br>TCRD | 98  | 265 | 131 | 1008 | 27.0 | 11.5 | 1.47E-11 |
| rs4982635  | 14 | 21949578 | TCRA,<br>TCRD | 99  | 264 | 138 | 1001 | 27.3 | 12.1 | 5.56E-11 |
| rs760019   | 14 | 21953018 | TCRA,<br>TCRD | 97  | 266 | 141 | 998  | 26.7 | 12.4 | 5.72E-10 |
| rs3811236  | 14 | 21956159 | TCRA,<br>TCRD | 101 | 262 | 154 | 985  | 27.8 | 13.5 | 1.76E-09 |
| rs2301201  | 14 | 21957570 | TCRA,<br>TCRD | 101 | 262 | 151 | 988  | 27.8 | 13.3 | 8.60E-10 |
| rs6572449  | 14 | 21970760 | TCRA,<br>TCRD | 101 | 262 | 160 | 979  | 27.8 | 14.0 | 7.22E-09 |
| rs7142158  | 14 | 21972830 | TCRA,<br>TCRD | 101 | 262 | 160 | 979  | 27.8 | 14.0 | 7.22E-09 |
| rs2141988  | 14 | 21973302 | TCRA,<br>TCRD | 101 | 262 | 158 | 981  | 27.8 | 13.9 | 4.07E-09 |
| rs3811232  | 14 | 21973771 | TCRA,<br>TCRD | 101 | 262 | 160 | 979  | 27.8 | 14.0 | 7.22E-09 |
| rs8021297  | 14 | 21974905 | TCRA,<br>TCRD | 101 | 262 | 162 | 977  | 27.8 | 14.2 | 1.28E-08 |
| rs11623995 | 14 | 21975565 | TCRA,<br>TCRD | 103 | 260 | 170 | 969  | 28.4 | 14.9 | 3.27E-08 |
| rs11157596 | 14 | 21976908 | TCRA,<br>TCRD | 104 | 259 | 177 | 962  | 28.7 | 15.5 | 7.69E-08 |
| rs12147516 | 14 | 21985656 | TCRA,<br>TCRD | 112 | 251 | 209 | 930  | 30.9 | 18.3 | 1.05E-06 |
| rs10483273 | 14 | 21986886 | TCRA,<br>TCRD | 111 | 252 | 209 | 930  | 30.6 | 18.3 | 1.53E-06 |
| rs11848747 | 14 | 21991120 | TCRA,<br>TCRD | 105 | 258 | 198 | 941  | 28.9 | 17.4 | 4.07E-06 |
| rs2242545  | 14 | 21994034 | TCRA,<br>TCRD | 105 | 258 | 206 | 933  | 28.9 | 18.1 | 1.52E-05 |
| rs1882704  | 14 | 21995192 | TCRA,<br>TCRD | 105 | 258 | 208 | 931  | 28.9 | 18.3 | 2.21E-05 |
| rs17794083 | 14 | 21996759 | TCRA,<br>TCRD | 105 | 258 | 218 | 921  | 28.9 | 19.1 | 1.29E-04 |
| rs10162417 | 14 | 21999540 | TCRA,<br>TCRD | 104 | 259 | 227 | 912  | 28.7 | 19.9 | 6.24E-04 |
| rs10131293 | 14 | 21999998 | TCRA,<br>TCRD | 104 | 259 | 225 | 914  | 28.7 | 19.8 | 4.64E-04 |
| rs2733776  | 14 | 22000627 | TCRA,<br>TCRD | 104 | 259 | 223 | 916  | 28.7 | 19.6 | 4.37E-04 |
| rs10483275 | 14 | 22002896 | TCRA,<br>TCRD | 97  | 266 | 209 | 930  | 26.7 | 18.3 | 7.46E-04 |
| rs8020193  | 14 | 22009307 | TCRA,<br>TCRD | 90  | 273 | 136 | 1003 | 24.8 | 11.9 | 1.15E-08 |

|            |    |          |               |    |     |     |      |      |      |          |
|------------|----|----------|---------------|----|-----|-----|------|------|------|----------|
| rs10483277 | 14 | 22010682 | TCRA,<br>TCRD | 89 | 274 | 134 | 1005 | 24.5 | 11.8 | 1.46E-08 |
| rs2293732  | 14 | 22011989 | TCRA,<br>TCRD | 89 | 274 | 134 | 1005 | 24.5 | 11.8 | 1.46E-08 |
| rs1076861  | 14 | 22012459 | TCRA,<br>TCRD | 87 | 276 | 129 | 1010 | 24.0 | 11.3 | 1.50E-08 |
| rs2254272  | 14 | 22012730 | TCRA,<br>TCRD | 87 | 276 | 121 | 1018 | 24.0 | 10.6 | 1.05E-09 |
| rs7161733  | 14 | 22015032 | TCRA,<br>TCRD | 78 | 285 | 111 | 1028 | 21.5 | 9.7  | 3.05E-08 |
| rs10132733 | 14 | 22016071 | TCRA,<br>TCRD | 76 | 287 | 109 | 1030 | 20.9 | 9.6  | 6.63E-08 |
| rs227859   | 14 | 22018311 | TCRA,<br>TCRD | 74 | 289 | 101 | 1038 | 20.4 | 8.9  | 1.76E-08 |
| rs762578   | 14 | 22020088 | TCRA,<br>TCRD | 69 | 294 | 91  | 1048 | 19.0 | 8.0  | 2.47E-08 |
| rs3811222  | 14 | 22020854 | TCRA,<br>TCRD | 69 | 294 | 91  | 1048 | 19.0 | 8.0  | 2.47E-08 |
| rs3811221  | 14 | 22022792 | TCRA,<br>TCRD | 62 | 301 | 72  | 1067 | 17.1 | 6.3  | 4.73E-09 |
| rs227867   | 14 | 22023701 | TCRA,<br>TCRD | 57 | 306 | 60  | 1079 | 15.7 | 5.3  | 1.71E-09 |
| rs996165   | 14 | 22024524 | TCRA,<br>TCRD | 53 | 310 | 50  | 1089 | 14.6 | 4.4  | 5.48E-10 |
| rs3811215  | 14 | 22024617 | TCRA,<br>TCRD | 53 | 310 | 50  | 1089 | 14.6 | 4.4  | 5.48E-10 |
| rs2128997  | 14 | 22030942 | TCRA,<br>TCRD | 23 | 340 | 25  | 1114 | 6.3  | 2.2  | 2.55E-04 |

**Supplementary Table 4. Replication Set-1 results for genome-wide significant SNPs with copy number changes in Discovery Phase.** Genomic coordinates based on build 36.1 of human genome. Two-tailed *P*-value based on Fisher's exact test reported. Results based on 363 Caucasian Cases and 1,139 healthy Caucasian Controls.

| SNP        | Chr | Position  | Genes         | Cases Loss | Cases No Loss | Ctrl Loss | Ctrl No Loss | Cases Loss % | Ctrl Loss % | P-value  |
|------------|-----|-----------|---------------|------------|---------------|-----------|--------------|--------------|-------------|----------|
| rs11579261 | 1   | 147305744 | Putative NBPF | 44         | 188           | 239       | 1979         | 19.0         | 10.8        | 4.93E-04 |
| rs17162082 | 1   | 147306690 | Putative NBPF | 44         | 188           | 239       | 1979         | 19.0         | 10.8        | 4.93E-04 |
| rs17161949 | 1   | 147311729 | Putative NBPF | 44         | 188           | 239       | 1979         | 19.0         | 10.8        | 4.93E-04 |
| rs6673776  | 1   | 147327306 | Putative NBPF | 44         | 188           | 236       | 1982         | 19.0         | 10.6        | 4.52E-04 |
| rs17162074 | 1   | 147331145 | Putative NBPF | 44         | 188           | 236       | 1982         | 19.0         | 10.6        | 4.52E-04 |
| rs11587304 | 1   | 147414362 | Putative NBPF | 33         | 199           | 122       | 2096         | 14.2         | 5.5         | 5.50E-06 |
| rs3853524  | 1   | 147427061 | Putative NBPF | 33         | 199           | 120       | 2098         | 14.2         | 5.4         | 2.59E-06 |
| rs7782269  | 7   | 38285115  | TCRG          | 69         | 163           | 155       | 2063         | 29.7         | 7.0         | 7.25E-22 |
| rs2240826  | 7   | 38285864  | TCRG          | 69         | 163           | 155       | 2063         | 29.7         | 7.0         | 7.25E-22 |
| rs2240827  | 7   | 38285961  | TCRG          | 69         | 163           | 155       | 2063         | 29.7         | 7.0         | 7.25E-22 |
| rs1546833  | 7   | 38290215  | TCRG          | 69         | 163           | 155       | 2063         | 29.7         | 7.0         | 7.25E-22 |
| rs10155916 | 7   | 38292303  | TCRG          | 70         | 162           | 153       | 2065         | 30.2         | 6.9         | 9.34E-23 |
| rs1860516  | 7   | 38292502  | TCRG          | 70         | 162           | 153       | 2065         | 30.2         | 6.9         | 9.34E-23 |
| rs2240832  | 7   | 38295538  | TCRG          | 72         | 160           | 159       | 2059         | 31.0         | 7.2         | 3.00E-23 |
| rs12154478 | 7   | 38296343  | TCRG          | 72         | 160           | 163       | 2055         | 31.0         | 7.3         | 9.76E-23 |
| rs1860517  | 7   | 38297335  | TCRG          | 72         | 160           | 162       | 2056         | 31.0         | 7.3         | 7.29E-23 |
| rs1860520  | 7   | 38297796  | TCRG          | 72         | 160           | 162       | 2056         | 31.0         | 7.3         | 7.29E-23 |
| rs1860521  | 7   | 38298029  | TCRG          | 72         | 160           | 162       | 2056         | 31.0         | 7.3         | 7.29E-23 |
| rs6462829  | 7   | 38298742  | TCRG          | 72         | 160           | 158       | 2060         | 31.0         | 7.1         | 2.22E-23 |
| rs10441090 | 7   | 38301343  | TCRG          | 72         | 160           | 160       | 2058         | 31.0         | 7.2         | 4.04E-23 |
| rs2191311  | 7   | 38302045  | TCRG          | 71         | 161           | 159       | 2059         | 30.6         | 7.2         | 1.29E-22 |
| rs2248839  | 7   | 38307751  | TCRG          | 64         | 168           | 131       | 2087         | 27.6         | 5.9         | 7.13E-22 |
| rs2736973  | 7   | 38308140  | TCRG          | 60         | 172           | 111       | 2107         | 25.9         | 5.0         | 3.66E-22 |
| rs2240839  | 7   | 38308450  | TCRG          | 54         | 178           | 107       | 2111         | 23.3         | 4.8         | 7.90E-19 |
| rs2392545  | 7   | 38309522  | TCRG          | 53         | 179           | 104       | 2114         | 22.8         | 4.7         | 1.28E-18 |
| rs2392546  | 7   | 38309610  | TCRG          | 50         | 182           | 104       | 2114         | 21.6         | 4.7         | 9.81E-17 |
| rs2736969  | 7   | 38310481  | TCRG          | 51         | 181           | 89        | 2129         | 22.0         | 4.0         | 1.37E-19 |
| rs2736964  | 7   | 38311294  | TCRG          | 48         | 184           | 82        | 2136         | 20.7         | 3.7         | 1.02E-18 |
| rs6953248  | 7   | 38322940  | TCRG          | 48         | 184           | 72        | 2146         | 20.7         | 3.2         | 1.83E-20 |
| rs17171329 | 7   | 38323070  | TCRG          | 48         | 184           | 72        | 2146         | 20.7         | 3.2         | 1.83E-20 |
| rs11769443 | 7   | 38323600  | TCRG          | 44         | 188           | 68        | 2150         | 19.0         | 3.1         | 2.15E-18 |
| rs11980080 | 7   | 38323719  | TCRG          | 44         | 188           | 66        | 2152         | 19.0         | 3.0         | 9.28E-19 |
| rs11765884 | 7   | 38323848  | TCRG          | 44         | 188           | 64        | 2154         | 19.0         | 2.9         | 3.91E-19 |
| rs2534565  | 7   | 38324752  | TCRG          | 40         | 192           | 40        | 2178         | 17.2         | 1.8         | 1.81E-21 |
| rs2240845  | 7   | 38324937  | TCRG          | 40         | 192           | 40        | 2178         | 17.2         | 1.8         | 1.81E-21 |
| rs2534567  | 7   | 38325481  | TCRG          | 40         | 192           | 40        | 2178         | 17.2         | 1.8         | 1.81E-21 |
| rs2534568  | 7   | 38326165  | TCRG          | 40         | 192           | 40        | 2178         | 17.2         | 1.8         | 1.81E-21 |
| rs2240848  | 7   | 38327992  | TCRG          | 39         | 193           | 37        | 2181         | 16.8         | 1.7         | 1.78E-21 |
| rs11975431 | 7   | 38328150  | TCRG          | 39         | 193           | 36        | 2182         | 16.8         | 1.6         | 9.41E-22 |
| rs718880   | 7   | 38328524  | TCRG          | 39         | 193           | 34        | 2184         | 16.8         | 1.5         | 2.52E-22 |
| rs2240849  | 7   | 38328597  | TCRG          | 39         | 193           | 35        | 2183         | 16.8         | 1.6         | 4.90E-22 |
| rs17171331 | 7   | 38329482  | TCRG          | 39         | 193           | 39        | 2179         | 16.8         | 1.8         | 6.12E-21 |

|            |    |           |               |    |     |     |      |      |     |          |
|------------|----|-----------|---------------|----|-----|-----|------|------|-----|----------|
| rs11984094 | 7  | 38330091  | TCRG          | 40 | 192 | 38  | 2180 | 17.2 | 1.7 | 5.25E-22 |
| rs2240850  | 7  | 38330273  | TCRG          | 40 | 192 | 39  | 2179 | 17.2 | 1.8 | 9.80E-22 |
| rs2240851  | 7  | 38330454  | TCRG          | 39 | 193 | 39  | 2179 | 16.8 | 1.8 | 6.12E-21 |
| rs17496969 | 7  | 38330814  | TCRG          | 39 | 193 | 38  | 2180 | 16.8 | 1.7 | 3.32E-21 |
| rs2735179  | 7  | 38331130  | TCRG          | 38 | 194 | 37  | 2181 | 16.4 | 1.7 | 1.12E-20 |
| rs10487742 | 7  | 38333037  | TCRG          | 36 | 196 | 29  | 2189 | 15.5 | 1.3 | 2.36E-21 |
| rs2191312  | 7  | 38333784  | TCRG          | 34 | 198 | 29  | 2189 | 14.7 | 1.3 | 1.05E-19 |
| rs6966279  | 7  | 38336073  | TCRG          | 32 | 200 | 27  | 2191 | 13.8 | 1.2 | 1.14E-18 |
| rs2534575  | 7  | 38337999  | TCRG          | 30 | 202 | 24  | 2194 | 12.9 | 1.1 | 6.05E-18 |
| rs2534578  | 7  | 38340056  | TCRG          | 26 | 206 | 18  | 2200 | 11.2 | 0.8 | 1.42E-16 |
| rs2240853  | 7  | 38341222  | TCRG          | 20 | 212 | 14  | 2204 | 8.6  | 0.6 | 6.45E-13 |
| rs733905   | 7  | 38346971  | TCRG          | 18 | 214 | 9   | 2209 | 7.8  | 0.4 | 4.34E-13 |
| rs2213212  | 7  | 142086318 | TCRVB         | 9  | 223 | 4   | 2214 | 3.9  | 0.2 | 2.69E-07 |
| rs2027801  | 7  | 142100266 | TCRVB         | 9  | 223 | 4   | 2214 | 3.9  | 0.2 | 2.69E-07 |
| rs17251    | 7  | 142102868 | TCRVB         | 9  | 223 | 3   | 2215 | 3.9  | 0.1 | 9.03E-08 |
| rs4726572  | 7  | 142104421 | TCRVB         | 9  | 223 | 3   | 2215 | 3.9  | 0.1 | 9.03E-08 |
| rs6464528  | 7  | 142104463 | TCRVB         | 9  | 223 | 3   | 2215 | 3.9  | 0.1 | 9.03E-08 |
| rs6959895  | 7  | 142114524 | TCRVB         | 10 | 222 | 3   | 2215 | 4.3  | 0.1 | 1.07E-08 |
| rs1964986  | 7  | 142127214 | TCRVB         | 10 | 222 | 3   | 2215 | 4.3  | 0.1 | 1.07E-08 |
| rs2855983  | 7  | 142178383 | TCRVB         | 8  | 224 | 3   | 2215 | 3.4  | 0.1 | 7.40E-07 |
| rs2734222  | 7  | 142187838 | TCRVB         | 8  | 224 | 2   | 2216 | 3.4  | 0.1 | 2.20E-07 |
| rs2734224  | 7  | 142188690 | TCRVB         | 8  | 224 | 2   | 2216 | 3.4  | 0.1 | 2.20E-07 |
| rs2367486  | 7  | 142192134 | TCRVB         | 7  | 225 | 2   | 2216 | 3.0  | 0.1 | 1.91E-06 |
| rs979027   | 14 | 21558349  | TCRA,<br>TCRD | 10 | 222 | 8   | 2210 | 4.3  | 0.4 | 1.06E-06 |
| rs17113407 | 14 | 21558421  | TCRA,<br>TCRD | 10 | 222 | 8   | 2210 | 4.3  | 0.4 | 1.06E-06 |
| rs7147975  | 14 | 21560562  | TCRA,<br>TCRD | 10 | 222 | 9   | 2209 | 4.3  | 0.4 | 2.06E-06 |
| rs12888049 | 14 | 21564578  | TCRA,<br>TCRD | 11 | 221 | 14  | 2204 | 4.7  | 0.6 | 5.86E-06 |
| rs8022710  | 14 | 21565869  | TCRA,<br>TCRD | 12 | 220 | 22  | 2196 | 5.2  | 1.0 | 3.25E-05 |
| rs990962   | 14 | 21637401  | TCRA,<br>TCRD | 25 | 207 | 78  | 2140 | 10.8 | 3.5 | 5.03E-06 |
| rs8022578  | 14 | 21640025  | TCRA,<br>TCRD | 28 | 204 | 83  | 2135 | 12.1 | 3.7 | 5.49E-07 |
| rs6572261  | 14 | 21641738  | TCRA,<br>TCRD | 28 | 204 | 85  | 2133 | 12.1 | 3.8 | 8.18E-07 |
| rs6572331  | 14 | 21784682  | TCRA,<br>TCRD | 38 | 194 | 104 | 2114 | 16.4 | 4.7 | 5.99E-10 |
| rs4982590  | 14 | 21788239  | TCRA,<br>TCRD | 37 | 195 | 100 | 2118 | 15.9 | 4.5 | 7.85E-10 |
| rs10148895 | 14 | 21792564  | TCRA,<br>TCRD | 39 | 193 | 100 | 2118 | 16.8 | 4.5 | 7.05E-11 |
| rs7155927  | 14 | 21800821  | TCRA,<br>TCRD | 40 | 192 | 105 | 2113 | 17.2 | 4.7 | 6.93E-11 |
| rs7141113  | 14 | 21805737  | TCRA,<br>TCRD | 40 | 192 | 100 | 2118 | 17.2 | 4.5 | 2.04E-11 |
| rs6572349  | 14 | 21806088  | TCRA,<br>TCRD | 40 | 192 | 102 | 2116 | 17.2 | 4.6 | 3.36E-11 |
| rs6572351  | 14 | 21806138  | TCRA,<br>TCRD | 40 | 192 | 102 | 2116 | 17.2 | 4.6 | 3.36E-11 |
| rs12881142 | 14 | 21806360  | TCRA,<br>TCRD | 40 | 192 | 102 | 2116 | 17.2 | 4.6 | 3.36E-11 |
| rs2331599  | 14 | 21806501  | TCRA,<br>TCRD | 40 | 192 | 104 | 2114 | 17.2 | 4.7 | 5.46E-11 |
| rs9972232  | 14 | 21807431  | TCRA,<br>TCRD | 47 | 185 | 120 | 2098 | 20.3 | 5.4 | 4.63E-13 |



|            |    |          |               |    |     |     |      |      |      |          |
|------------|----|----------|---------------|----|-----|-----|------|------|------|----------|
| rs3811272  | 14 | 21811574 | TCRA,<br>TCRD | 49 | 183 | 124 | 2094 | 21.1 | 5.6  | 9.98E-14 |
| rs741711   | 14 | 21923525 | TCRA,<br>TCRD | 52 | 180 | 178 | 2040 | 22.4 | 8.0  | 2.74E-10 |
| rs3811250  | 14 | 21925810 | TCRA,<br>TCRD | 52 | 180 | 176 | 2042 | 22.4 | 7.9  | 2.12E-10 |
| rs3811247  | 14 | 21928200 | TCRA,<br>TCRD | 52 | 180 | 172 | 2046 | 22.4 | 7.8  | 8.24E-11 |
| rs3811244  | 14 | 21929322 | TCRA,<br>TCRD | 53 | 179 | 176 | 2042 | 22.8 | 7.9  | 9.71E-11 |
| rs12891257 | 14 | 21931475 | TCRA,<br>TCRD | 54 | 178 | 169 | 2049 | 23.3 | 7.6  | 5.23E-12 |
| rs10142552 | 14 | 21933475 | TCRA,<br>TCRD | 54 | 178 | 169 | 2049 | 23.3 | 7.6  | 5.23E-12 |
| rs3811240  | 14 | 21937715 | TCRA,<br>TCRD | 55 | 177 | 171 | 2047 | 23.7 | 7.7  | 2.52E-12 |
| rs1040303  | 14 | 21941618 | TCRA,<br>TCRD | 57 | 175 | 170 | 2048 | 24.6 | 7.7  | 2.06E-13 |
| rs7150307  | 14 | 21943295 | TCRA,<br>TCRD | 57 | 175 | 167 | 2051 | 24.6 | 7.5  | 1.09E-13 |
| rs11624054 | 14 | 21944336 | TCRA,<br>TCRD | 57 | 175 | 165 | 2053 | 24.6 | 7.4  | 7.11E-14 |
| rs714795   | 14 | 21946458 | TCRA,<br>TCRD | 59 | 173 | 165 | 2053 | 25.4 | 7.4  | 6.28E-15 |
| rs4982635  | 14 | 21949578 | TCRA,<br>TCRD | 58 | 174 | 173 | 2045 | 25.0 | 7.8  | 1.19E-13 |
| rs760019   | 14 | 21953018 | TCRA,<br>TCRD | 61 | 171 | 179 | 2039 | 26.3 | 8.1  | 1.20E-14 |
| rs3811236  | 14 | 21956159 | TCRA,<br>TCRD | 63 | 169 | 212 | 2006 | 27.2 | 9.6  | 1.03E-12 |
| rs2301201  | 14 | 21957570 | TCRA,<br>TCRD | 64 | 168 | 213 | 2005 | 27.6 | 9.6  | 5.01E-13 |
| rs6572449  | 14 | 21970760 | TCRA,<br>TCRD | 69 | 163 | 266 | 1952 | 29.7 | 12.0 | 1.46E-11 |
| rs7142158  | 14 | 21972830 | TCRA,<br>TCRD | 69 | 163 | 268 | 1950 | 29.7 | 12.1 | 1.81E-11 |
| rs2141988  | 14 | 21973302 | TCRA,<br>TCRD | 69 | 163 | 269 | 1949 | 29.7 | 12.1 | 2.04E-11 |
| rs3811232  | 14 | 21973771 | TCRA,<br>TCRD | 69 | 163 | 269 | 1949 | 29.7 | 12.1 | 2.04E-11 |
| rs8021297  | 14 | 21974905 | TCRA,<br>TCRD | 69 | 163 | 269 | 1949 | 29.7 | 12.1 | 2.04E-11 |
| rs11623995 | 14 | 21975565 | TCRA,<br>TCRD | 69 | 163 | 273 | 1945 | 29.7 | 12.3 | 4.78E-11 |
| rs11157596 | 14 | 21976908 | TCRA,<br>TCRD | 69 | 163 | 282 | 1936 | 29.7 | 12.7 | 1.70E-10 |
| rs12147516 | 14 | 21985656 | TCRA,<br>TCRD | 79 | 153 | 321 | 1897 | 34.1 | 14.5 | 2.32E-12 |
| rs10483273 | 14 | 21986886 | TCRA,<br>TCRD | 78 | 154 | 318 | 1900 | 33.6 | 14.3 | 3.95E-12 |
| rs11848747 | 14 | 21991120 | TCRA,<br>TCRD | 70 | 162 | 285 | 1933 | 30.2 | 12.8 | 1.05E-10 |
| rs2242545  | 14 | 21994034 | TCRA,<br>TCRD | 68 | 164 | 282 | 1936 | 29.3 | 12.7 | 3.60E-10 |
| rs1882704  | 14 | 21995192 | TCRA,<br>TCRD | 68 | 164 | 282 | 1936 | 29.3 | 12.7 | 3.60E-10 |
| rs17794083 | 14 | 21996759 | TCRA,<br>TCRD | 68 | 164 | 282 | 1936 | 29.3 | 12.7 | 3.60E-10 |
| rs10162417 | 14 | 21999540 | TCRA,<br>TCRD | 68 | 164 | 286 | 1932 | 29.3 | 12.9 | 7.94E-10 |
| rs10131293 | 14 | 21999998 | TCRA,<br>TCRD | 68 | 164 | 285 | 1933 | 29.3 | 12.8 | 7.56E-10 |
| rs2733776  | 14 | 22000627 | TCRA,<br>TCRD | 68 | 164 | 279 | 1939 | 29.3 | 12.6 | 2.77E-10 |
| rs10483275 | 14 | 22002896 | TCRA,<br>TCRD | 62 | 170 | 263 | 1955 | 26.7 | 11.9 | 6.17E-09 |
| rs8020193  | 14 | 22009307 | TCRA,<br>TCRD | 54 | 178 | 171 | 2047 | 23.3 | 7.7  | 7.72E-12 |

|            |    |          |               |    |     |     |      |      |     |          |
|------------|----|----------|---------------|----|-----|-----|------|------|-----|----------|
| rs10483277 | 14 | 22010682 | TCRA,<br>TCRD | 51 | 181 | 154 | 2064 | 22.0 | 6.9 | 7.80E-12 |
| rs2293732  | 14 | 22011989 | TCRA,<br>TCRD | 51 | 181 | 152 | 2066 | 22.0 | 6.9 | 5.18E-12 |
| rs1076861  | 14 | 22012459 | TCRA,<br>TCRD | 50 | 182 | 135 | 2083 | 21.6 | 6.1 | 4.08E-13 |
| rs2254272  | 14 | 22012730 | TCRA,<br>TCRD | 49 | 183 | 132 | 2086 | 21.1 | 6.0 | 6.90E-13 |
| rs7161733  | 14 | 22015032 | TCRA,<br>TCRD | 45 | 187 | 115 | 2103 | 19.4 | 5.2 | 1.65E-12 |
| rs10132733 | 14 | 22016071 | TCRA,<br>TCRD | 43 | 189 | 109 | 2109 | 18.5 | 4.9 | 4.56E-12 |
| rs227859   | 14 | 22018311 | TCRA,<br>TCRD | 37 | 195 | 91  | 2127 | 15.9 | 4.1 | 8.93E-11 |
| rs762578   | 14 | 22020088 | TCRA,<br>TCRD | 31 | 201 | 77  | 2141 | 13.4 | 3.5 | 4.39E-09 |
| rs3811222  | 14 | 22020854 | TCRA,<br>TCRD | 31 | 201 | 72  | 2146 | 13.4 | 3.2 | 1.20E-09 |
| rs3811221  | 14 | 22022792 | TCRA,<br>TCRD | 27 | 205 | 62  | 2156 | 11.6 | 2.8 | 1.29E-08 |
| rs227867   | 14 | 22023701 | TCRA,<br>TCRD | 25 | 207 | 61  | 2157 | 10.8 | 2.8 | 1.20E-07 |
| rs996165   | 14 | 22024524 | TCRA,<br>TCRD | 24 | 208 | 55  | 2163 | 10.3 | 2.5 | 8.63E-08 |
| rs3811215  | 14 | 22024617 | TCRA,<br>TCRD | 22 | 210 | 52  | 2166 | 9.5  | 2.3 | 4.74E-07 |
| rs2128997  | 14 | 22030942 | TCRA,<br>TCRD | 17 | 215 | 31  | 2187 | 7.3  | 1.4 | 6.52E-07 |

**Supplementary Table 5. Replication Set-2 results for genome-wide significant SNPs with copy number changes in Discovery Phase.** Genomic coordinates based on build 36.1 of human genome. Two-tailed *P*-value based on Fisher's exact test reported. Results based on 232 Caucasian Cases and 2,218 healthy Caucasian Controls.

| Deletion                               | Age at Diagnosis | INSS Stage | <i>MYCN</i> Status | DNA Index | Shimada Histology | COG Risk Group |
|----------------------------------------|------------------|------------|--------------------|-----------|-------------------|----------------|
| <b>All Annotated Cases (N=1,418)</b>   |                  |            |                    |           |                   |                |
|                                        | (n=1407)         | (n=1352)   | (n=1292)           | (n=1272)  | (n=1111)          | (n=1323)       |
| <b>1q21.1 (NBPF)</b>                   | 0.0565           | 0.8195     | 0.5368             | 0.2276    | 0.8682            | 0.3576         |
| <b>Annotated Blood Cases (N=1,229)</b> |                  |            |                    |           |                   |                |
|                                        | (n=1222)         | (n=1179)   | (n=1133)           | (n=1130)  | (n=964)           | (n=1155)       |
| <b><i>TCRG</i></b>                     | <0.0001          | 0.0220     | 0.0015             | 0.3744    | <0.0001           | <0.0001        |
| <b><i>TCRVB</i></b>                    | 0.0063           | 0.2432     | 0.3354             | 0.2568    | <0.0001           | 0.0710         |
| <b><i>TCRA/D</i></b>                   | <0.0001          | 0.0036     | <0.0001            | 0.7073    | <0.0001           | <0.0001        |

**Supplementary Table 6. Association with clinical and biological co-variates.**

Association with clinical and biological co-variates was assessed for each deletion associated with neuroblastoma using Fisher's exact Test. Two-sided p-values are listed. Annotated cases from the combined set of cases were divided into those with and without deletion and then into those with favorable vs. unfavorable assignment for the variable. Unfavorable was considered: Age  $\geq$  1 yr, INSS Stage = 4, *MYCN* status = Amplified, DNA index = diploid, Shimada Histology = unfavorable, Risk = high. TCR deletion associations were assessed using only blood cases given that deletions were significantly more common in peripheral blood than bone marrow (see text).

|                   | <b>rs9295536<br/>genotype</b> | <b>rs69393490<br/>genotype</b> | <b>rs4712653<br/>genotype</b> | <b>1q21.1<br/>del</b> | <b>TCRG<br/>del</b> | <b>TCRVB<br/>del</b> | <b>TCRA/D<br/>del</b> |
|-------------------|-------------------------------|--------------------------------|-------------------------------|-----------------------|---------------------|----------------------|-----------------------|
| <b>1q21.1 del</b> | 0.244                         | 0.915                          | 0.948                         | 0                     | 0.3803              | 0.5893               | 0.3474                |
| <b>TCRG del</b>   | 0.388                         | 0.587                          | 0.343                         | -                     | 0                   | < 0.0001             | <0.0001               |
| <b>TCRVB del</b>  | 0.065                         | 0.228                          | 0.126                         | -                     | -                   | 0                    | <0.0001               |
| <b>TCRA/D del</b> | 0.319                         | 0.337                          | 0.534                         | -                     | -                   | -                    | 0                     |

**Supplementary Table 7. Assessment of co-occurrence of predisposition loci.** Interaction and co-occurrence of neuroblastoma susceptibility loci was assessed in 1,209 neuroblastoma cases common between this study and our previous SNP-based GWAS<sup>7</sup>. Previously identified SNPs on 6p22 associated with neuroblastoma were evaluated in a 2x3 contingency table analysis based on 1q21.1 and TCR deletion status (deletion yes/no) vs. genotype (AA, AB, BB). P-values are presented in columns 1-3; no significant interaction was detected. Co-occurrence of 1q21.1 deletion and TCR deletions was assessed using Fisher's exact test, two-sided p-values are listed in columns 4-7; a highly significant co-occurrence of TCR deletions was observed.

## SUPPLEMENTARY FIGURES AND LEGENDS

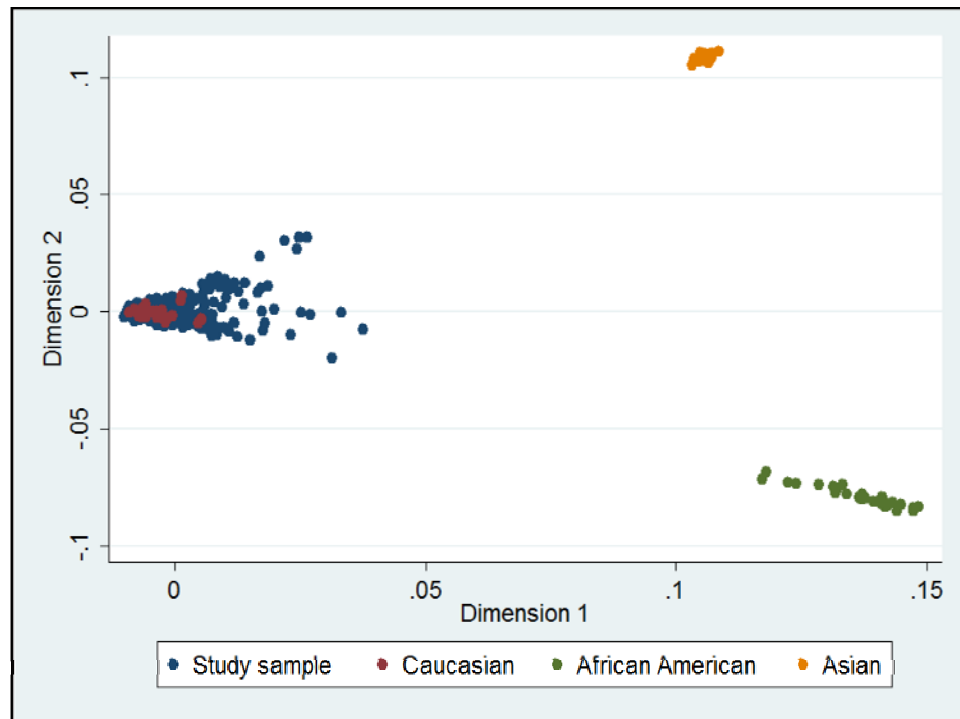

**Supplementary Figure 1. 1q21.1 CNV remains significant after adjusting for potential population substructure.** Plot of first two dimensions from multi-dimensional scaling (MDS) analysis of Caucasian cases (n=846) and controls (n=803) from discovery set ("Study sample", blue) and independent sets of well-characterized Caucasian (red, n=27), African American (green, N=29) and Asian (orange, n=28) individuals, also genotyped on the Illumina HumanHap550 SNP array. 1q21.1 CNV remains significant ( $P < 0.0001$ ) after adjusting for first three coordinates of MDS (C1-C3) in logistic regression analysis. CNV analyzed by copy number at representative SNP rs11579261.

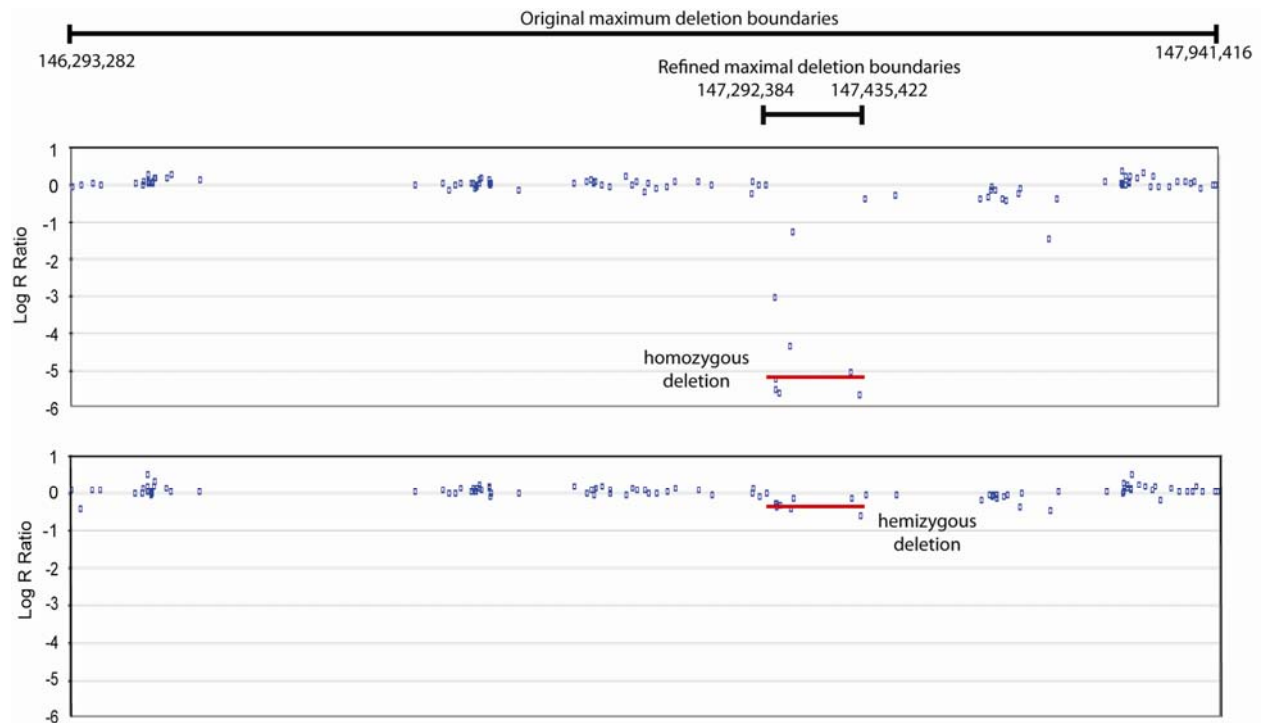

**Supplementary Figure 2. Refinement of 1q21.1 maximal deletion boundaries.** Original maximal boundaries based on 550K SNP data spanned over 1.6 megabases (146,293,282 - 147,941,416). Refined maximal deletion based on Illumina HumanHap610 SNP data is only 143,038 bp (147,292,384 - 147,435,422). The novel *NBPF* (partial) transcript identified in this study maps within the refined deletion boundaries (147,396,848 - 147,421,562). Shown are plots of the Log R Ratio signal intensity data for a homozygous deletion (top) and a hemizygous deletion (bottom) from two neuroblastoma cases. Red lines indicate the median Log R Ratio within the respective deletions. All genomic coordinates based on build 36 of the human genome.

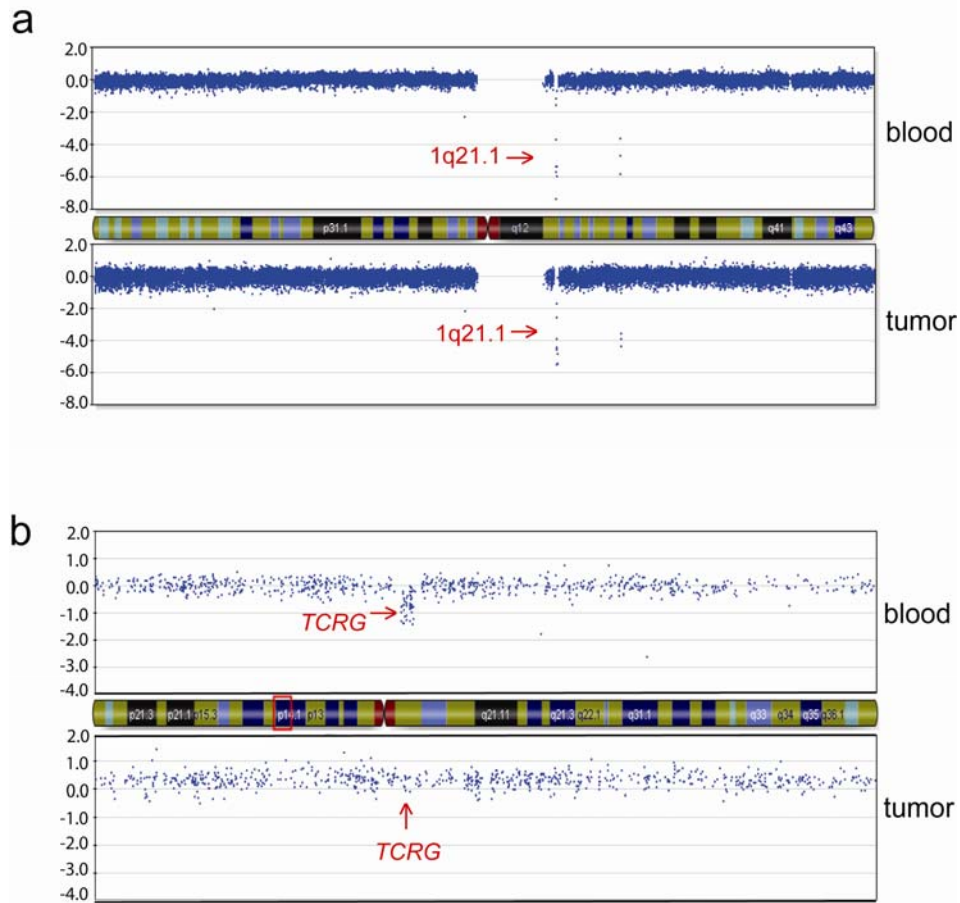

**Supplementary Figure 3. Comparison of copy number in blood and matched tumor DNA.**

Matched tumor DNA on 226 cases was utilized to assess whether significant findings from the CNV-based GWAS were true germline deletions or somatically acquired rearrangements detected in the blood. 100% agreement was detected for the deletions at 1q21.1, consistent with germline alterations. 0% agreement was detected for the deletions within the T-cell receptor genes. Plots of Log R Ratio signal intensity data are shown. **a.** An example neuroblastoma case with homozygous deletion at 1q21.1 detected in the blood (top). This homozygous deletion was confirmed in matched tumor DNA from this patient (bottom). **b.** An example neuroblastoma case with detectable deletion within *TCRG* in the blood (top), but no evidence of deletion in the paired tumor DNA (bottom).

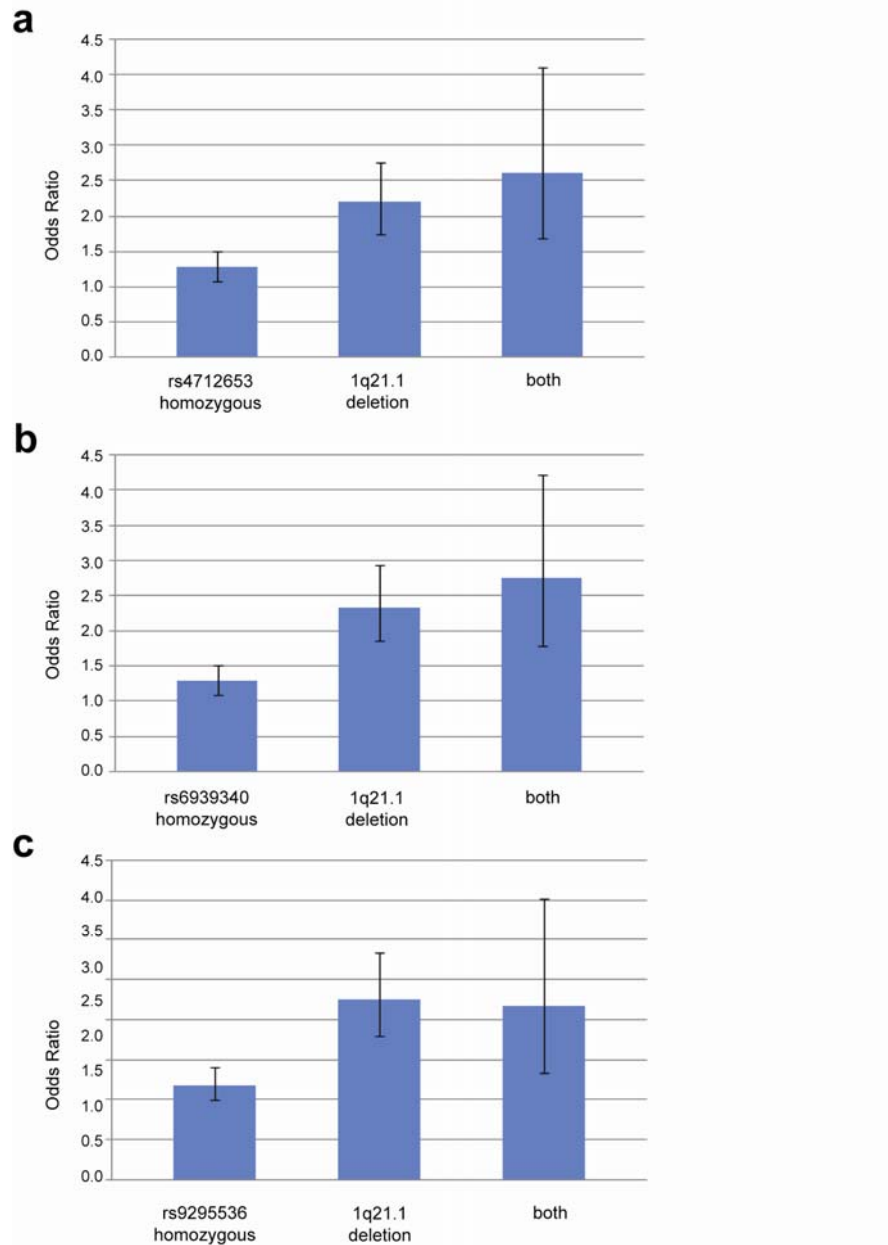

**Supplementary Figure 4. Additive effect of combined 1q21.1 deletion and 6p22 risk alleles.** Bar charts of the odds ratio for homozygosity (for risk allele) at each of the previously identified neuroblastoma-associated SNPs on 6p22<sup>7</sup>, along with the odds ratio for 1q21.1 deletion identified in this study and the combination of homozygous SNP genotype and 1q21.1 deletion. 95% CI indicated by black bars. Only cases with both genotype and CNV data available were considered. **(a)** rs4712654 (1182 cases, 1940 controls) **(b)** rs6939340 (1206 cases, 1940 controls). **(c)** rs9295536 (1209 cases, 1940 controls).



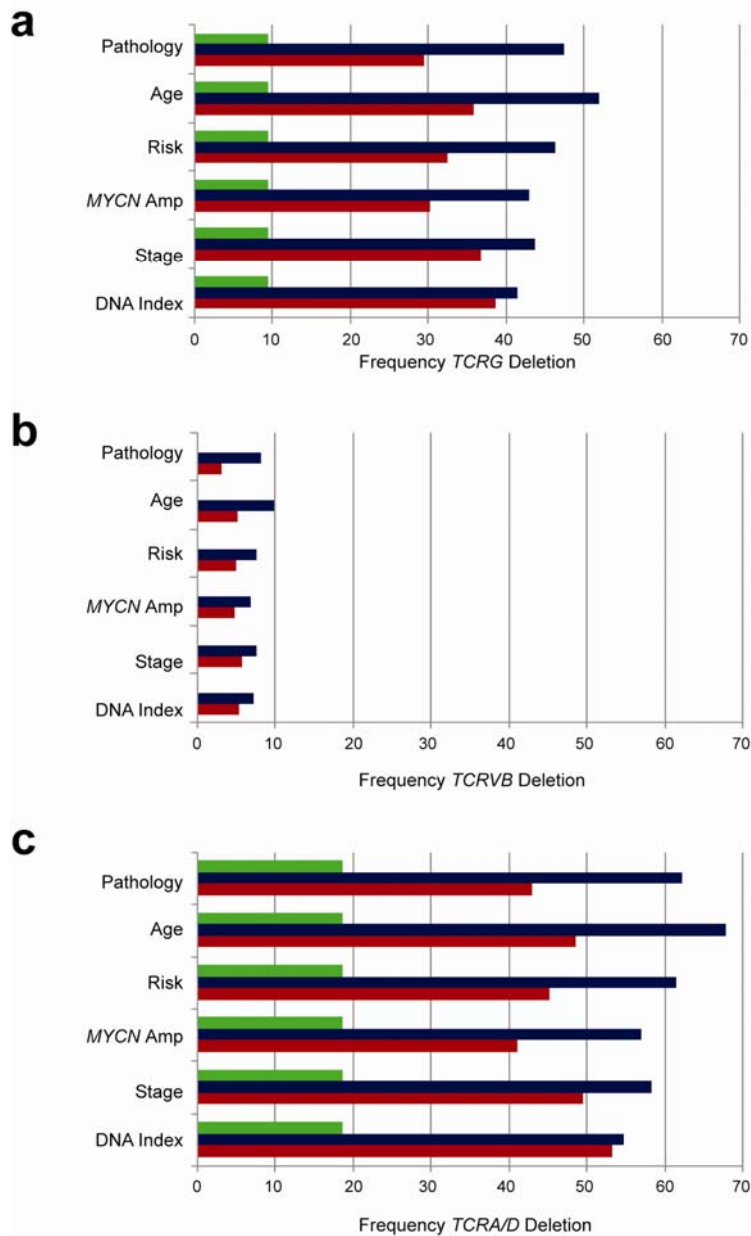

**Supplementary Figure 5. TCR deletions are more common in less aggressive phenotype.**

Bar chart of frequency of deletion is plotted for controls (green), cases in favorable subset (blue) and cases in unfavorable subset (red). Unfavorable was defined as Pathology = Unfavorable, Age  $\geq$  1-yr, Risk = High, MYCN Amp = yes, Stage = 4, DNA Index = diploid. **a.** *TCRG* **b.** *TCRVB* **c.** *TCRA/TCRD*. Frequencies are based on detection of deletion at any of the SNPs significantly associated with neuroblastoma.



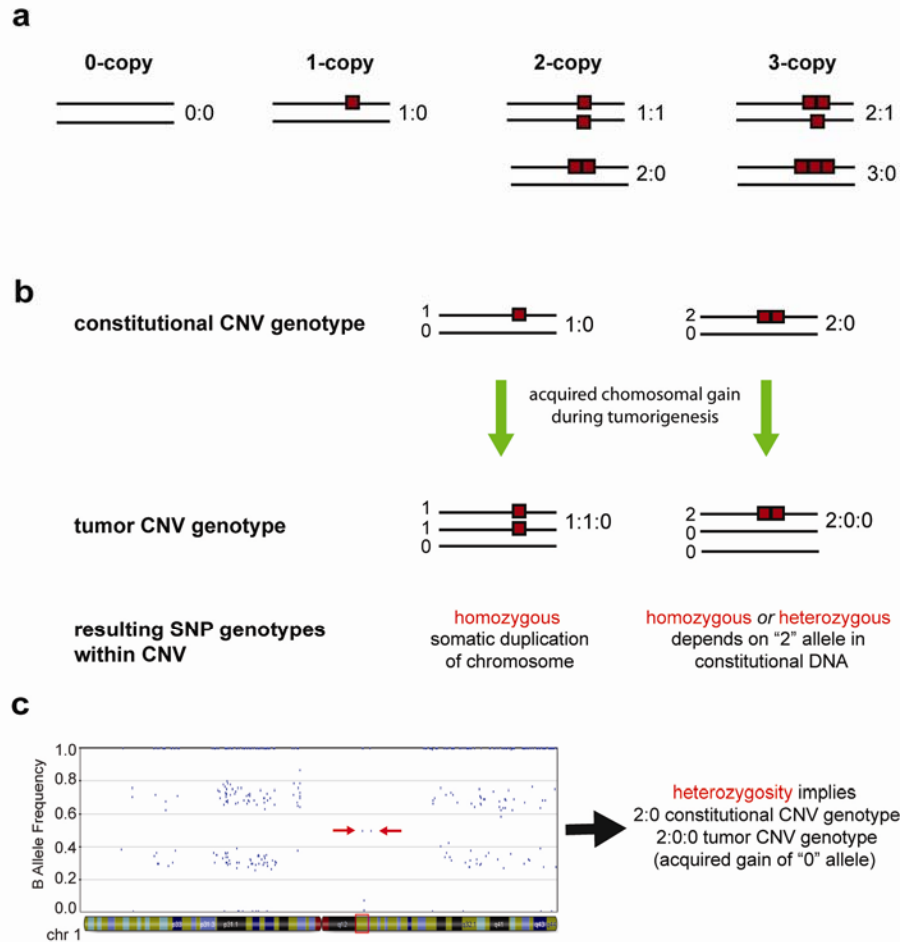

**Supplementary Figure 7. Constitutional and tumor DNA 1q21.1 CNV genotypes. a.** Possible constitutional 1q21.1 CNV genotypes for 0-, 1-, 2- and 3-copies. *Black lines*: copies of chromosome 1 in a diploid genome. *Red boxes*: copies of the DNA within the CNV. Only one possible CNV genotype exists for both 0- and 1-copy samples, however two possible underlying CNV genotypes exist for both 2- and 3-copy samples. **b.** Possible ways of obtaining 2-copies at 1q21.1 CNV in a tumor sample with somatically acquired gain of chromosome 1 (3 copies). Starting constitutional CNV genotype of 1:0 would result in homozygous SNPs in the tumor DNA, whereas a constitutional CNV genotype of 2:0 could present as homozygous or heterozygous SNPs in the tumor DNA. **c.** Neuroblastoma cell line with 2-copies at CNV and acquired gain of chromosome 1 (3-copy). Heterozygous SNPs are observed within the CNV (red arrows), consistent only with the 2:0 constitutional genotype.
